# Supplementary material
Source: publisher site journal article supplement (https://www.dovepress.com/get_supplementary_file.php?f=381954.docx)
Supplement: Supplementary file 1 [file get_supplementary_file.php]

Appendix A

| **Construct** | **Measurement items** | **SL** |
| --- | --- | --- |
| **LMX Ambivalence**  CR =0.889, AVE =0.652,  α = 0.821, KMO=0.902 | I have conflicting thoughts: sometimes I think that my working relationship with my manager is very good, while at other times I don’t. | 0.816 |
| I have conflicting thoughts: sometimes I think my manager understands my problems and needs, while at other times I don’t. | 0.805 |
| I have conflicting thoughts: sometimes I think my manager would use his/her power to help to solve problems in my work, while at other times I don’t. | 0.806 |
| I have conflicting thoughts: sometimes I think I know where I stand with my manager, while at other times I don’t. | 0.820 |
| I have conflicting thoughts: sometimes I think that my manager would “bail me out” at his/her expense, while at other times I don’t. | 0.763 |
| I have conflicting thoughts: sometimes I think my manager recognizes my potential, while at other times I don’t. | 0.807 |
| I have conflicting thoughts: sometimes I think that I would defend and justify my manager’s decisions if he/she were not present to do so, while at other times I don’t. | 0.822 |
| **Cognitive flexibility**  CR =0.903, AVE =0.726,  α = 0.825, KMO=0.805 | I can communicate an idea in many different ways | 0.734 |
| I avoid new and unusual situations.（R） | 0.803 |
| I feel like I never get to make decisions（R） | 0.750 |
| I can find workable solutions to seemingly unsolvable problems | 0.765 |
| I seldom have choices when deciding how to behave（R） | 0.696 |
| I am willing to work at creative solutions to problems. | 0.734 |
| In any given situation, I am able to act appropriately. | 0.722 |
| My behavior is a result of conscious decisions that I make. | 0.779 |
| I have many possible ways of behaving in any given situation. | 0.802 |
| I have difficulty using my knowledge on a given topic in real life situations.（R） | 0.772 |
| I am willing to listen and consider alternatives for handling a problem | 0.793 |
| I have the self-confidence necessary to try different ways of behaving | 0.786 |
| **Job anxiety**  CR =0.894， AVE =0.708,  α = 0.768, KMO=0.805 | I have felt fidgety or nervous as a result of my job | 0.734 |
| The job requires me to undertake extra responsibilities beyond the work itself | 0.751 |
| There are lots of times when my job drives me right up the wall | 0.760 |
| Sometimes when I think about my job I get a tight feeling in my chest | 0.804 |
| I feel guilty when I take time off from job | 0.808 |
| **Integrative complexity**  CR =0.856, AVE =0.693,  α = 0.873, KMO=0.832 | I believe in the value of dissent | 0.825 |
| I understand how there can always be divergent viewpoints on certain issues. | 0.783 |
| I often recognize how multiple, potentially competing, perspectives have validity | 0.736 |
| I try to view issues from multiple perspectives | 0.745 |
| I believe there are no clear right and wrong, or good and bad, ways of doing things | 0.764 |
| I tend to be receptive to different points of view on an issue | 0.814 |
| I believe that trade-offs can be avoided when making decisions; in other words, everybody can win | 0.774 |
| When there are different perspectives on an issue, I often points out the common areas of overlap that may serve to bridge these differences | 0.778 |
| I highlight connections between seemingly conflicting perspectives raised by people on an issue | 0.782 |
| I tend to suggest new solutions that take into consideration the different viewpoints raised by people | 0.787 |
| I am often able to come up with new solutions covering different viewpoints | 0.741 |
| **Bootleg Innovation**  CR =0.823, AVE =0.593,  α = 0.737, KMO=0.744 | I have the flexibility to work my way around my official work plan, digging into new potentially valuable business opportunities. | 0.767 |
| My work plan does not allow me the time to work on anything other than the projects I have been assigned to. | 0.738 |
| I enjoy tinkering around with ideas that are outside the main projects I work on. | 0.729 |
| I am running several pet projects that allow me to learn about new areas. | 0.763 |
| I proactively take time to work on unofficial projects to seed future official projects. | 0.650 |

*Notes: AVE:* [*Average Variance Extracted*](https://www.youtube.com/watch?v=8tyjdfpiAJQ)*; CR: Composite reliability; KMO: Kaiser-Meyer-Olkin criterion; SL: Standardized loading*
